# Supplementary material for: HPVbase – a knowledgebase of viral integrations, methylation patterns and microRNAs aberrant expression: As potential biomarkers for Human papillomaviruses mediated carcinomas
Source: PubMed Central journal article supplement (PMC4513345; doi:10.1038/srep12522), 2015-07-24
Supplement: srep12522-s1.pdf [file srep12522-s1.pdf]

**HPVbase – A knowledgebase of viral integrations, methylation patterns and microRNAs aberrant expression: As potential biomarkers in Human papillomaviruses mediated carcinomas**

Amit Kumar Gupta<sup>1</sup> and Manoj Kumar<sup>1,\*</sup>

<sup>1</sup>Bioinformatics Centre, Institute of Microbial Technology, Council of Scientific and Industrial Research (CSIR), Sector 39-A, Chandigarh-160036, India

\* To whom correspondence should be addressed. Tel, 91-172-6665453; Fax, 91-172-2690585; 91-172-2690632; Email, [manojk@imtech.res.in](mailto:manojk@imtech.res.in)

## **Additional files**

### **Additional file 1**

**Figure S1** Screenshot showing integration site mapped on the HPV16 (NC\_001526.2) reference genome, along with detailed description such as human genome position, region of HPV genome, junction sequence, source, integrated HPV DNA sequence and length.

**Figure S2** Distribution of integration sites among distinct HPV types.

**Figure S3** Distribution of integration sites among distinct cancer types.

**Figure S4** Representing number of integration sites distributed at major genomic loci regions.

**Figure S5** A screenshot depicting integration data with corresponding clinical annotations and reference information in tabular format.

**Figure S6** Screenshot showing highly interactive and user intensive methylation browser with associated histological information.

**Figure S7** Graph showing distribution of methylation sites among distinct HPV types.

**Figure S8** An example screenshot illustrating HPV mediated upregulated miRNAs expression profile and analysis with interconnected external links.

**Table S1** List of available major resources specific for methylation data.

**Table S2** List of available major resources related to microRNA data.

**Table S3** List of human genes altered or disrupted due to HPV integration events.

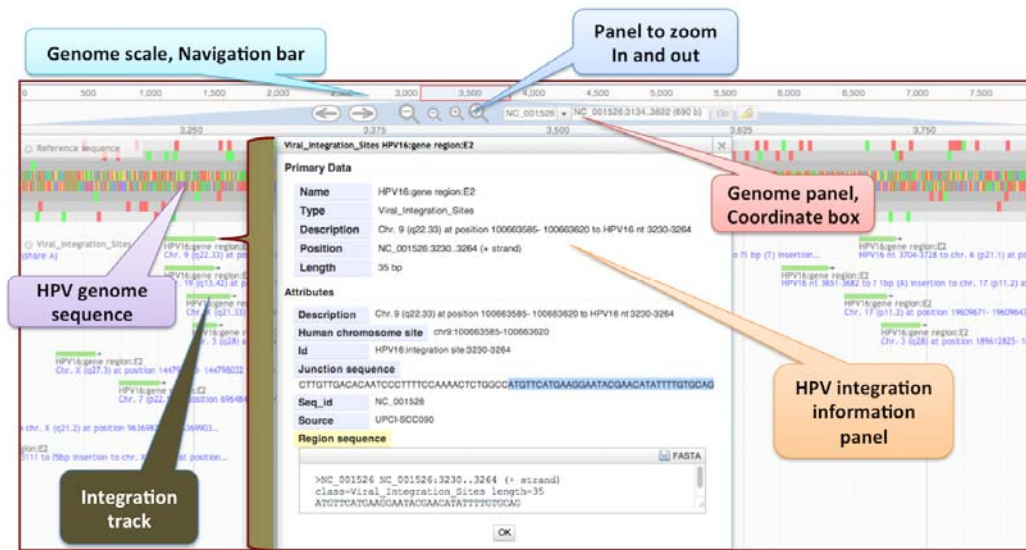

**Figure S1** Screenshot showing integration site mapped on the HPV16 (NC\_001526.2) reference genome, along with detailed description such as human genome position, region of HPV genome, junction sequence, source, integrated HPV DNA sequence and length.

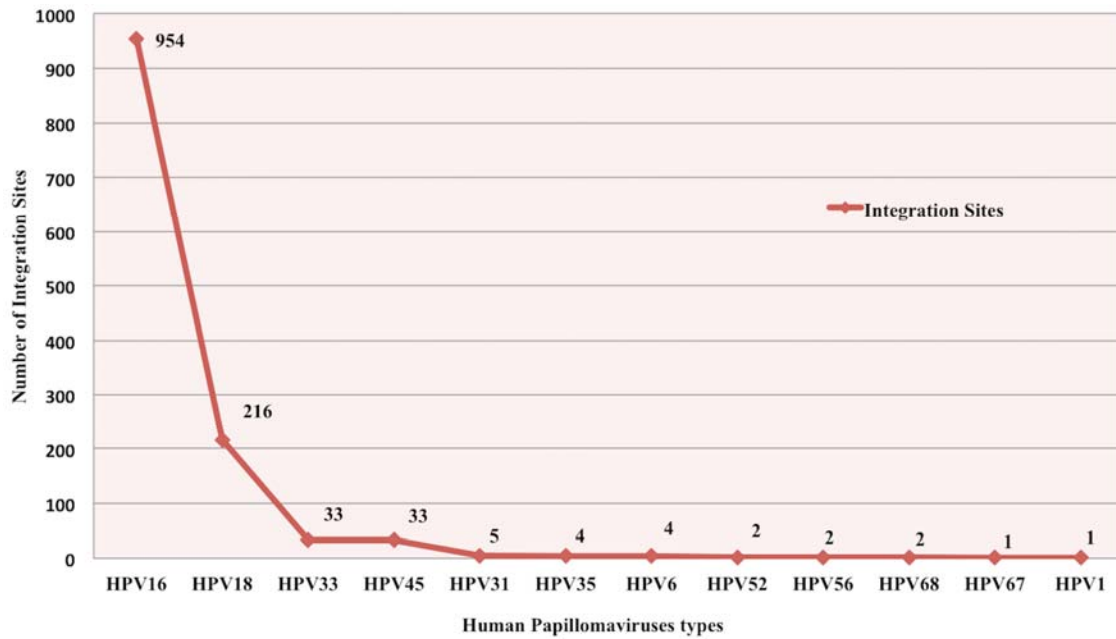

**Figure S2** Distribution of integration sites among distinct HPV types.

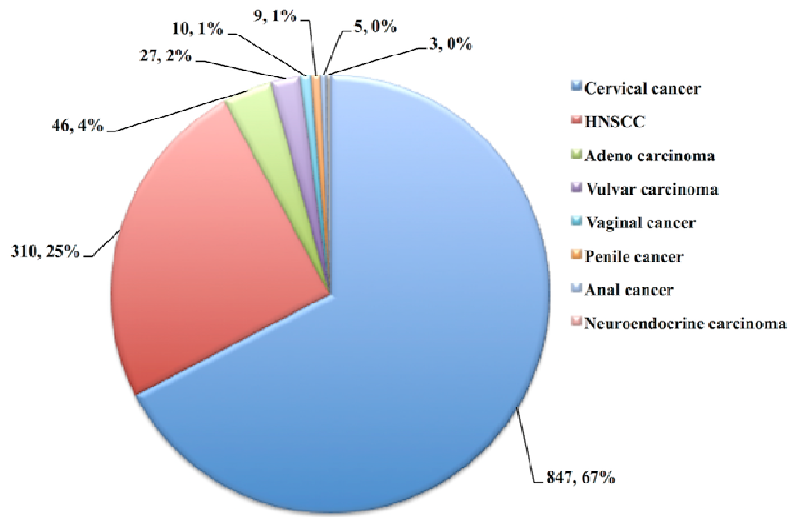

**Figure S3** Distribution of integration sites among distinct cancer types.

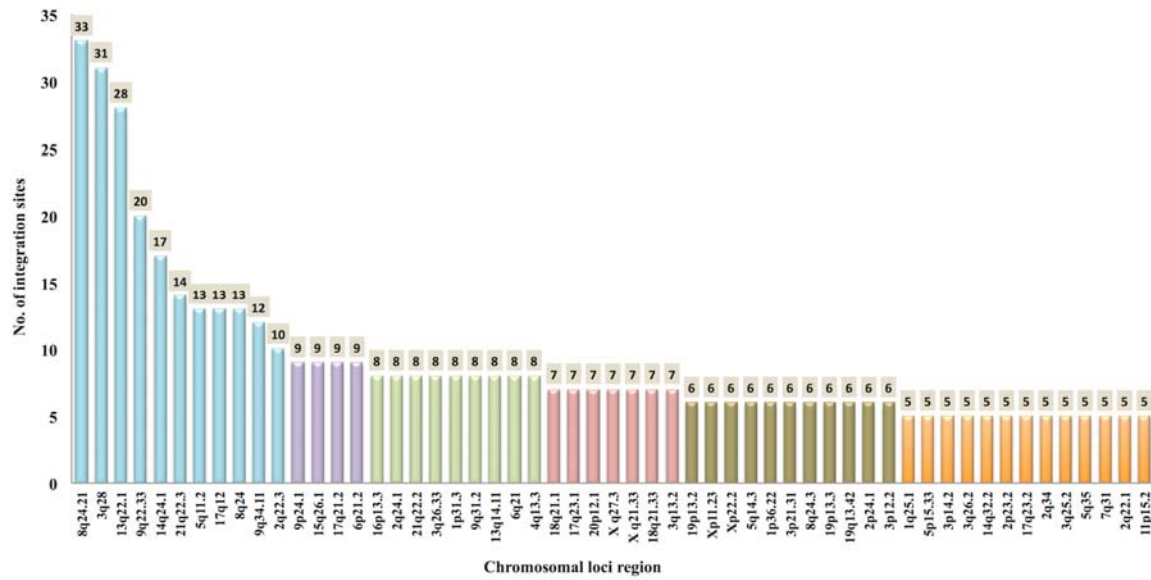

**Figure S4** Representing number of integration sites distributed at major genomic loci regions.

**HPV Integration and Breakpoints**

Show 50 entries **Filter number of entries per page** Search option Search:

| S.No. | HPV Type | HPV region | Viral Integrant/Breakpoint | Human Chr. No. | Cytoband | Human Chr. location/Cellular breakpoint | Target genes            | Fragile Sites | Sample type/Specimen               | Sample Size | Cancer type/Histology | Detection Technique                       | References |
|-------|----------|------------|----------------------------|----------------|----------|-----------------------------------------|-------------------------|---------------|------------------------------------|-------------|-----------------------|-------------------------------------------|------------|
| 1     | HPV16    | E1         | 918                        | 14             | q24.1    | 68899686                                | RAD51B                  | -             | -                                  | -           | HNSCC                 | WGS, RNA-seq, Whole-Exome sequencing, PCR | 25313082   |
| 68    | HPV16    | L1         | 6925                       | X              | p11.23   | 46529359                                | SLC8A7                  | -             | Tumor Sample                       | 35          | HNSCC                 | WGS, RNA-seq, Whole-Exome sequencing, PCR | 25313082   |
| 129   | HPV16    | -          | -                          | 22             | q12.3    | -                                       | TIMP3, FBXO7, LARGE-AS1 | FRA22B        | Cervical biopsy samples            | 40          | CC                    | APOT assay, PCR                           | 24992025   |
| 130   | HPV16    | -          | -                          | 2              | q37      | -                                       | AGAP1, LOC642692, Gbx2  | FRA22B        | -                                  | -           | CC                    | APOT assay, PCR                           | 24992025   |
| 223   | HPV16    | E2         | 2875                       | 17             | q21.2    | 39678949                                | -                       | FRA17A1       | -                                  | -           | OSCC                  | DIPS-PCR                                  | 24586378   |
| 224   | HPV16    | E1         | 1124                       | 7              | q21.1    | 99750064                                | LAMTOR4, C7orf59        | FRA7F         | Fresh frozen clinical OSCC samples | 75          | CC                    | DIPS-PCR                                  | 24586378   |
| 239   | HPV16    | E2         | 3097                       | 17             | q21.2    | 103336522                               | TRAF3                   | FRA14C        | Fresh frozen clinical OSCC samples | -           | CC                    | APOT assay, PCR                           | 24586378   |
| 488   | HPV16    | E7         | 578                        | 3              | q28      | 189238853                               | TP63                    | -             | SSC                                | 239         | HNSCC                 | RNA-seq                                   | 23740984   |
| 489   | HPV16    | E6         | 139                        | 18             | q21.1    | 45567460                                | ZBTB7C                  | -             | SSC                                | 239         | HNSCC                 | RNA-seq                                   | 23740984   |
| 706   | HPV16    | E2/E4      | 3503                       | 2              | q34      | -                                       | ERBB4                   | -             | -                                  | -           | CC                    | APOT assay                                | 12813471   |
| 707   | HPV16    | E1         | 2339                       | 3              | q27      | -                                       | -                       | FRA3C         | Cervical biopsy samples            | 21          | CC                    | APOT assay                                | 12813471   |
| 708   | HPV16    | E1         | 1654                       | 7              | p22      | -                                       | DGKB                    | FRA7B         | Cancer Biopsy samples              | 21          | CC                    | DIPS, APOT assay                          | 12813471   |
| 709   | HPV16    | E1         | 1464                       | -              | -        | -                                       | BMP2K                   | -             | Cancer Biopsy samples              | 21          | Vaginal carcinoma     | DIPS, APOT assay                          | 12813471   |
| 710   | HPV16    | E1         | 1256                       | X              | p22      | -                                       | -                       | FRAXB         | Cancer Biopsy samples              | 21          | Vaginal carcinoma     | DIPS, APOT assay                          | 12813471   |

**Figure S5** A screenshot depicting integration data with corresponding clinical annotations and reference information in tabular format.

**Genome scale, Navigation bar**

**Panel to zoom In and out**

**HPVs accession number**

**Reference information**

**HPV reference sequence**

**Genome panel, Coordinate box**

**Clinical methylation information**

**Genome sequence panel**

**Feature tracks**

**Figure S6** Screenshot showing highly interactive and user intensive methylation browser with associated histological information.

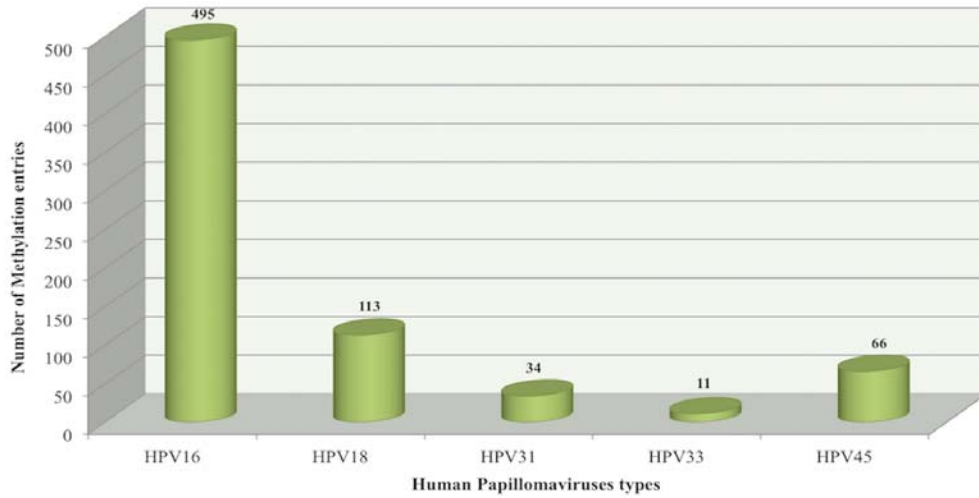

**Figure S7** Graph showing distribution of methylation sites among distinct HPV types.

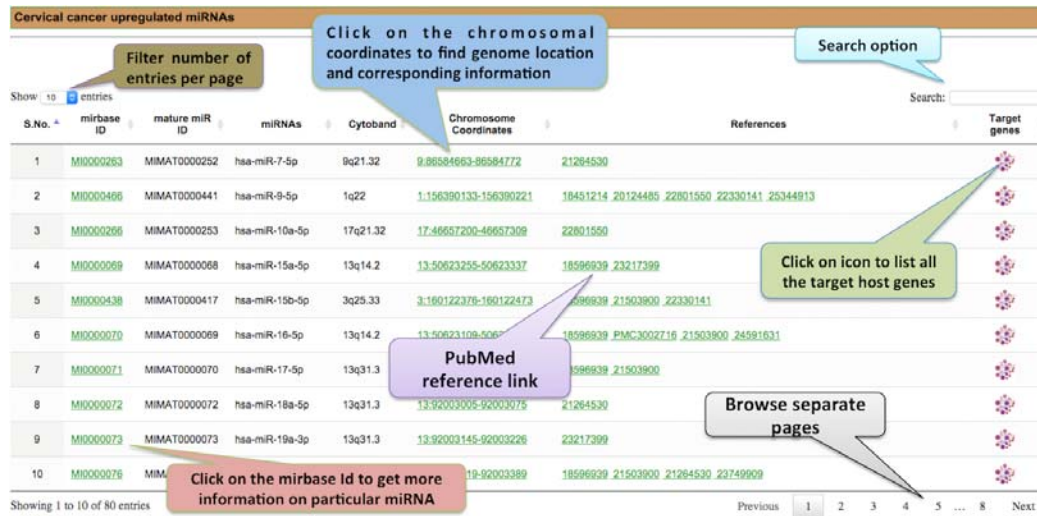

**Figure S8** An example screenshot illustrating HPV mediated upregulated miRNAs expression profile and analysis with interconnected external links.

**Table S1** List of available major resources specific for methylation data.

| <b>Database Name</b> | <b>References</b> |
|----------------------|-------------------|
| MethDB               | 1                 |
| MethyCancer          | 2                 |
| MethCancerDB         | 3                 |
| PubMeth              | 4                 |
| DiseaseMeth          | 5                 |
| MethylomeDB          | 6                 |
| NGSmethDB            | 7                 |
| PCMdb                | 8                 |

**Table S2** List of available major resources related to microRNA data.

| <b>Database Name</b> | <b>References</b> |
|----------------------|-------------------|
| miRGen               | 9                 |
| ViTa                 | 10                |
| miRNAMap             | 11                |
| MicroRNA.org         | 12                |
| Vir-Mir db           | 13                |
| miRecords            | 14                |
| miOrtho              | 15                |
| miR2Disease          | 16                |
| PMRD                 | 17                |
| TransmiR             | 18                |
| PmiRKB               | 19                |
| mESAdb               | 20                |
| TarBase              | 21                |
| miREX                | 22                |
| miRGator             | 23                |
| mirbase              | 24                |
| miRTarBase           | 25                |
| miRNEST              | 26                |
| HMDD v2.0            | 27                |

## References:

- 1 Amoreira, C., Hindermann, W. & Grunau, C. An improved version of the DNA Methylation database (MethDB). *Nucleic Acids Res***31**, 75-77 (2003).
- 2 He, X. *et al.* MethyCancer: the database of human DNA methylation and cancer. *Nucleic Acids Res***36**, D836-841; DOI:10.1093/nar/gkm730 (2008).
- 3 Lauss, M. *et al.* MethCancerDB--aberrant DNA methylation in human cancer. *Br J Cancer***98**, 816-817; DOI:10.1038/sj.bjc.6604219 (2008).
- 4 Ongenaert, M. *et al.* PubMeth: a cancer methylation database combining text-mining and expert annotation. *Nucleic Acids Res***36**, D842-846; DOI:10.1093/nar/gkm788 (2008).
- 5 Lv, J. *et al.* DiseaseMeth: a human disease methylation database. *Nucleic Acids Res***40**, D1030-1035; DOI:10.1093/nar/gkr1169 (2012).
- 6 Xin, Y. *et al.* MethylomeDB: a database of DNA methylation profiles of the brain. *Nucleic Acids Res***40**, D1245-1249; DOI:10.1093/nar/gkr1193 (2012).
- 7 Geisen, S., Barturen, G., Alganza, A. M., Hackenberg, M. & Oliver, J. L. NGSmethDB: an updated genome resource for high quality, single-cytosine resolution methylomes. *Nucleic Acids Res***42**, D53-59; DOI:10.1093/nar/gkt1202 (2014).
- 8 Nagpal, G. *et al.* PCMDB: pancreatic cancer methylation database. *Sci Rep***4**, 4197; DOI:10.1038/srep04197 (2014).
- 9 Megraw, M., Sethupathy, P., Corda, B. & Hatzigeorgiou, A. G. miRGen: a database for the study of animal microRNA genomic organization and function. *Nucleic Acids Res***35**, D149-155; DOI:10.1093/nar/gkl904 (2007).
- 10 Hsu, P. W., Lin, L. Z., Hsu, S. D., Hsu, J. B. & Huang, H. D. ViTa: prediction of host microRNAs targets on viruses. *Nucleic Acids Res***35**, D381-385; DOI:10.1093/nar/gkl1009 (2007).
- 11 Hsu, S. D. *et al.* miRNAMap 2.0: genomic maps of microRNAs in metazoan genomes. *Nucleic Acids Res***36**, D165-169; DOI:10.1093/nar/gkm1012 (2008).
- 12 Betel, D., Wilson, M., Gabow, A., Marks, D. S. & Sander, C. The microRNA.org resource: targets and expression. *Nucleic Acids Res***36**, D149-153; DOI:10.1093/nar/gkm995 (2008).
- 13 Li, S. C., Shiau, C. K. & Lin, W. C. Vir-Mir db: prediction of viral microRNA candidate hairpins. *Nucleic Acids Res***36**, D184-189; DOI:10.1093/nar/gkm610 (2008).
- 14 Xiao, F. *et al.* miRecords: an integrated resource for microRNA-target interactions. *Nucleic Acids Res***37**, D105-110; DOI:10.1093/nar/gkn851 (2009).
- 15 Gerlach, D., Kriventseva, E. V., Rahman, N., Vejnar, C. E. & Zdobnov, E. M. miROrtho: computational survey of microRNA genes. *Nucleic Acids Res***37**, D111-117; DOI:10.1093/nar/gkn707 (2009).
- 16 Jiang, Q. *et al.* miR2Disease: a manually curated database for microRNA deregulation in human disease. *Nucleic Acids Res***37**, D98-104; DOI:10.1093/nar/gkn714 (2009).
- 17 Zhang, Z. *et al.* PMRD: plant microRNA database. *Nucleic Acids Res***38**, D806-813; DOI:10.1093/nar/gkp818 (2010).
- 18 Wang, J., Lu, M., Qiu, C. & Cui, Q. TransmiR: a transcription factor-microRNA regulation database. *Nucleic Acids Res***38**, D119-122; DOI:10.1093/nar/gkp803 (2010).
- 19 Meng, Y. *et al.* PmiRKB: a plant microRNA knowledge base. *Nucleic Acids Res***39**, D181-187; DOI:10.1093/nar/gkq721 (2011).



- 20 Kaya, K. D., Karakulah, G., Yakicier, C. M., Acar, A. C. & Konu, O. mESAdb: microRNA expression and sequence analysis database. *Nucleic Acids Res***39**, D170-180; DOI:10.1093/nar/gkq1256 (2011).
- 21 Vergoulis, T. *et al.* TarBase 6.0: capturing the exponential growth of miRNA targets with experimental support. *Nucleic Acids Res***40**, D222-229; DOI:10.1093/nar/gkr1161 (2012).
- 22 Bielewicz, D. *et al.* mirEX: a platform for comparative exploration of plant pri-miRNA expression data. *Nucleic Acids Res***40**, D191-197; DOI:10.1093/nar/gkr878 (2012).
- 23 Cho, S. *et al.* MiRGator v3.0: a microRNA portal for deep sequencing, expression profiling and mRNA targeting. *Nucleic Acids Res***41**, D252-257; DOI:10.1093/nar/gks1168 (2013).
- 24 Kozomara, A. & Griffiths-Jones, S. miRBase: annotating high confidence microRNAs using deep sequencing data. *Nucleic Acids Res***42**, D68-73; DOI:10.1093/nar/gkt1181 (2014).
- 25 Hsu, S. D. *et al.* miRTarBase update 2014: an information resource for experimentally validated miRNA-target interactions. *Nucleic Acids Res***42**, D78-85; DOI:10.1093/nar/gkt1266 (2014).
- 26 Szczesniak, M. W. & Makalowska, I. miRNEST 2.0: a database of plant and animal microRNAs. *Nucleic Acids Res***42**, D74-77; DOI:10.1093/nar/gkt1156 (2014).
- 27 Li, Y. *et al.* HMDD v2.0: a database for experimentally supported human microRNA and disease associations. *Nucleic Acids Res***42**, D1070-1074; DOI:10.1093/nar/gkt1023 (2014).

**Table S3** List of human genes altered or disrupted due to HPV integration events.

| S. No. | Gene Name | Frequency |
|--------|-----------|-----------|
| 1      | MYC       | 15        |
| 2      | TP63      | 13        |
| 3      | RAD51B    | 12        |
| 4      | KLF12     | 10        |
| 5      | KLF5      | 9         |
| 6      | ETS2      | 7         |
| 7      | TCTEX1D1  | 7         |
| 8      | FHIT      | 7         |
| 9      | DIAPH2    | 7         |
| 10     | HEMGN     | 7         |
| 11     | ZBTB7C    | 6         |
| 12     | ACTL7B    | 6         |
| 13     | IFT140    | 5         |
| 14     | CRAT      | 5         |
| 15     | SLC9A7    | 5         |
| 16     | CEACAM5   | 5         |
| 17     | BRSK1     | 5         |
| 18     | SERPINB3  | 5         |
| 19     | LRP1B     | 5         |
| 20     | EPSTI1    | 5         |
| 21     | TEAD1     | 5         |
| 22     | PHLDB2    | 5         |
| 23     | CD274     | 4         |
| 24     | FANCC     | 4         |
| 25     | ERBB2     | 4         |
| 26     | LEPREL1   | 4         |
| 27     | TUBD1     | 4         |
| 28     | CASZ1     | 4         |
| 29     | POU5F1B   | 4         |
| 30     | ANPEP     | 4         |
| 31     | PLCXD2    | 4         |
| 32     | ASIC2     | 4         |
| 33     | NR4A2     | 3         |
| 34     | FRMPD4    | 3         |
| 35     | MRPS31    | 3         |
| 36     | BCL11B    | 3         |

| S. No. | Gene Name | Frequency |
|--------|-----------|-----------|
| 241    | PKP2      | 1         |
| 242    | MEX3B     | 1         |
| 243    | B4GALNT2  | 1         |
| 244    | TLE4      | 1         |
| 245    | TMPRSS11B | 1         |
| 246    | STK11     | 1         |
| 247    | MACC1     | 1         |
| 248    | KCND3     | 1         |
| 249    | SLC6A14   | 1         |
| 250    | IL1RAPL1  | 1         |
| 251    | Mar-10    | 1         |
| 252    | PAEP      | 1         |
| 253    | FBXL7     | 1         |
| 254    | TBX22     | 1         |
| 255    | SNX19     | 1         |
| 256    | DPF3      | 1         |
| 257    | ABCA13    | 1         |
| 258    | ZXDA      | 1         |
| 259    | SLC26A8   | 1         |
| 260    | P2RY1     | 1         |
| 261    | ABCB10    | 1         |
| 262    | HNRPDL    | 1         |
| 263    | PDE7B     | 1         |
| 264    | MAP3K5    | 1         |
| 265    | TYW1      | 1         |
| 266    | SLC25A25  | 1         |
| 267    | PTEN      | 1         |
| 268    | POMP      | 1         |
| 269    | HNF1B     | 1         |
| 270    | GOLPH3L   | 1         |
| 271    | NID1      | 1         |
| 272    | TP73      | 1         |
| 273    | CDH10     | 1         |
| 274    | PKHD1     | 1         |
| 275    | MPPED2    | 1         |
| 276    | LRRC28    | 1         |

|    |          |   |
|----|----------|---|
| 37 | RARA     | 3 |
| 38 | SLITRK2  | 3 |
| 39 | VMP1     | 3 |
| 40 | MACROD2  | 3 |
| 41 | GPN1     | 3 |
| 42 | IL8      | 3 |
| 43 | ERBB4    | 3 |
| 44 | EYA2     | 3 |
| 45 | COX4I2   | 3 |
| 46 | MYCN     | 3 |
| 47 | RREB1    | 3 |
| 48 | GRB7     | 3 |
| 49 | LYST     | 3 |
| 50 | FOXO1    | 3 |
| 51 | ACCN1    | 3 |
| 52 | PRKRIR   | 2 |
| 53 | SERPINB4 | 2 |
| 54 | IQGAP1   | 2 |
| 55 | MAGI2    | 2 |
| 56 | TRPC4AP  | 2 |
| 57 | PRDX5    | 2 |
| 58 | EBAG9    | 2 |
| 59 | COX6B1   | 2 |
| 60 | UPK1A    | 2 |
| 61 | DAPK1    | 2 |
| 62 | PROX1    | 2 |
| 63 | TNIK     | 2 |
| 64 | AGO2     | 2 |
| 65 | STARD3   | 2 |
| 66 | BRE      | 2 |
| 67 | JUP      | 2 |
| 68 | INO80C   | 2 |
| 69 | ATXN2    | 2 |
| 70 | SEMA4B   | 2 |
| 71 | UBAP2    | 2 |
| 72 | GATAD2A  | 2 |
| 73 | USP4     | 2 |
| 74 | LIPC     | 2 |
| 75 | ORC2     | 2 |

|     |          |   |
|-----|----------|---|
| 277 | THSD4    | 1 |
| 278 | CCR7     | 1 |
| 279 | BRCA1    | 1 |
| 280 | PHF12    | 1 |
| 281 | ATP8B1   | 1 |
| 282 | SLC9A8   | 1 |
| 283 | LPP      | 1 |
| 284 | DUX4     | 1 |
| 285 | INPP4B   | 1 |
| 286 | MAPK10   | 1 |
| 287 | JAK2     | 1 |
| 288 | CDIP1    | 1 |
| 289 | RFFL     | 1 |
| 290 | MALT1    | 1 |
| 291 | BSPH1    | 1 |
| 292 | SEZ6L    | 1 |
| 293 | FAM110B  | 1 |
| 294 | KIAA1432 | 1 |
| 295 | EIF1     | 1 |
| 296 | ZNF506   | 1 |
| 297 | CEACAM6  | 1 |
| 298 | CAMK1G   | 1 |
| 299 | UMOD     | 1 |
| 300 | PIM1     | 1 |
| 301 | CDH13    | 1 |
| 302 | ZEB2     | 1 |
| 303 | MAP4     | 1 |
| 304 | DGKB     | 1 |
| 305 | BMP2K    | 1 |
| 306 | RANBP9   | 1 |
| 307 | ZDHHC21  | 1 |
| 308 | SI       | 1 |
| 309 | MUC5B    | 1 |
| 310 | KCNIP1   | 1 |
| 311 | MYF5     | 1 |
| 312 | NOTCH1   | 1 |
| 313 | RIPK2    | 1 |
| 314 | ELK3     | 1 |
| 315 | ODC1     | 1 |

|     |          |   |
|-----|----------|---|
| 76  | MECOM    | 2 |
| 77  | RPA3     | 2 |
| 78  | MIOS     | 2 |
| 79  | SLC47A2  | 2 |
| 80  | PDE4D    | 2 |
| 81  | CTIF     | 2 |
| 82  | OR1M1    | 2 |
| 83  | TNFSF4   | 2 |
| 84  | ATP11A   | 2 |
| 85  | SLC25A36 | 2 |
| 86  | SOX2     | 2 |
| 87  | DRAP1    | 2 |
| 88  | GMPS     | 2 |
| 89  | SRGAP1   | 2 |
| 90  | Nf1      | 2 |
| 91  | WASF2    | 2 |
| 92  | GLS      | 2 |
| 93  | XPR1     | 2 |
| 94  | SLC22A23 | 2 |
| 95  | EHF      | 2 |
| 96  | SERPINB2 | 2 |
| 97  | JAG1     | 2 |
| 98  | TMCC3    | 2 |
| 99  | KLHL28   | 2 |
| 100 | ITGB6    | 2 |
| 101 | SLC1A3   | 2 |
| 102 | EPHX2    | 2 |
| 103 | PRKACA   | 2 |
| 104 | CD34     | 2 |
| 105 | FAM120B  | 2 |
| 106 | LRFN5    | 2 |
| 107 | ESRRA    | 2 |
| 108 | PKHD1L1  | 2 |
| 109 | ANAPC16  | 2 |
| 110 | EIF2C2   | 2 |
| 111 | MDM2     | 2 |
| 112 | MYOF     | 2 |
| 113 | FAM179B  | 2 |
| 114 | CCDC88B  | 2 |

|     |          |   |
|-----|----------|---|
| 316 | RPS27    | 1 |
| 317 | PTPN13   | 1 |
| 318 | KLHL3    | 1 |
| 319 | TCP1     | 1 |
| 320 | KPNA3    | 1 |
| 321 | AFP      | 1 |
| 322 | MED24    | 1 |
| 323 | TERT     | 1 |
| 324 | TLL7     | 1 |
| 325 | TRAP1    | 1 |
| 326 | FAM92A1  | 1 |
| 327 | PTPRD    | 1 |
| 328 | ZSCAN5A  | 1 |
| 329 | CDKAL1   | 1 |
| 330 | MSI2     | 1 |
| 331 | USP21    | 1 |
| 332 | ZFAND3   | 1 |
| 333 | ALS2CR11 | 1 |
| 334 | MYO1D    | 1 |
| 335 | TNFAIP2  | 1 |
| 336 | ARCN1    | 1 |
| 337 | SH3PXD2A | 1 |
| 338 | RHEB     | 1 |
| 339 | GPAA1    | 1 |
| 340 | FOXK1    | 1 |
| 341 | SNIP1    | 1 |
| 342 | FMO3     | 1 |
| 343 | RAP2B    | 1 |
| 344 | MAFA     | 1 |
| 345 | EGFL7    | 1 |
| 346 | KRT39    | 1 |
| 347 | TBL1XR1  | 1 |
| 348 | CYS1     | 1 |
| 349 | KCNIP4   | 1 |
| 350 | SLC7A11  | 1 |
| 351 | ARHGAP26 | 1 |
| 352 | SH3TC2   | 1 |
| 353 | IMMP2L   | 1 |
| 354 | NPM3     | 1 |

|     |          |   |
|-----|----------|---|
| 115 | SYBU     | 2 |
| 116 | CDK4     | 2 |
| 117 | SERPINB7 | 1 |
| 118 | DOLPP1   | 1 |
| 119 | PLGRKT   | 1 |
| 120 | ARHGDI A | 1 |
| 121 | CCDC39   | 1 |
| 122 | TTC14    | 1 |
| 123 | CEACAM19 | 1 |
| 124 | GRIK1    | 1 |
| 125 | KIAA1279 | 1 |
| 126 | ARHGEF10 | 1 |
| 127 | ANGPT1   | 1 |
| 128 | SLC41A2  | 1 |
| 129 | RFX7     | 1 |
| 130 | THSD1    | 1 |
| 131 | EXOC7    | 1 |
| 132 | ROCK2    | 1 |
| 133 | MSH2     | 1 |
| 134 | COG4     | 1 |
| 135 | WWOX     | 1 |
| 136 | ADAMTS18 | 1 |
| 137 | MAP1LC3B | 1 |
| 138 | LMBR1    | 1 |
| 139 | TNC      | 1 |
| 140 | ASCC1    | 1 |
| 141 | ZNF365   | 1 |
| 142 | SETBP1   | 1 |
| 143 | MAK      | 1 |
| 144 | ACTN4    | 1 |
| 145 | TLL1     | 1 |
| 146 | Egr1     | 1 |
| 147 | FANCM    | 1 |
| 148 | PIBF1    | 1 |
| 149 | TIMP3    | 1 |
| 150 | AGAP1    | 1 |
| 151 | CD28     | 1 |
| 152 | EIF2AK2  | 1 |
| 153 | CACNA1E  | 1 |

|     |         |   |
|-----|---------|---|
| 355 | SSPN    | 1 |
| 356 | HAUS4   | 1 |
| 357 | AGBL1   | 1 |
| 358 | FLRT3   | 1 |
| 359 | SMARCA1 | 1 |
| 360 | DYX1C1  | 1 |
| 361 | NFIX    | 1 |
| 362 | ZNF277  | 1 |
| 363 | LRSAM1  | 1 |
| 364 | PCDH7   | 1 |
| 365 | DEPTOR  | 1 |
| 366 | HEATR1  | 1 |
| 367 | RNGTT   | 1 |
| 368 | NUP35   | 1 |
| 369 | SH3BP5  | 1 |
| 370 | PALB2   | 1 |
| 371 | TMEM114 | 1 |
| 372 | BCL2L13 | 1 |
| 373 | COG8    | 1 |
| 374 | MRVI1   | 1 |
| 375 | MID1    | 1 |
| 376 | DNAJC15 | 1 |
| 377 | PTHLH   | 1 |
| 378 | KLF7    | 1 |
| 379 | GPD2    | 1 |
| 380 | CXCL6   | 1 |
| 381 | CFTR    | 1 |
| 382 | PCDH9   | 1 |
| 383 | AKR1C3  | 1 |
| 384 | MPZL3   | 1 |
| 385 | DDX21   | 1 |
| 386 | ETV2    | 1 |
| 387 | VPS36   | 1 |
| 388 | FOXJ1   | 1 |
| 389 | EPCAM   | 1 |
| 390 | SF3B3   | 1 |
| 391 | NUDT7   | 1 |
| 392 | FBXO31  | 1 |
| 393 | NOM1    | 1 |

|     |          |   |
|-----|----------|---|
| 154 | DENND6A  | 1 |
| 155 | SEMA3E   | 1 |
| 156 | RHOH     | 1 |
| 157 | INSR     | 1 |
| 158 | CCNE1    | 1 |
| 159 | GLI2     | 1 |
| 160 | ARID1B   | 1 |
| 161 | BLVRA    | 1 |
| 162 | SNX30    | 1 |
| 163 | POC1B    | 1 |
| 164 | DACH1    | 1 |
| 165 | PARN     | 1 |
| 166 | P4HB     | 1 |
| 167 | PTPRT    | 1 |
| 168 | USP9X    | 1 |
| 169 | GATA5    | 1 |
| 170 | GOLT1A   | 1 |
| 171 | ERC2     | 1 |
| 172 | EPHA7    | 1 |
| 173 | SYN3     | 1 |
| 174 | HCN4     | 1 |
| 175 | HDAC2    | 1 |
| 176 | SGSM1    | 1 |
| 177 | GARS     | 1 |
| 178 | LAMTOR4  | 1 |
| 179 | LHFPL3   | 1 |
| 180 | PNRC1    | 1 |
| 181 | DEPDC5   | 1 |
| 182 | TRAF3    | 1 |
| 183 | PHF21B   | 1 |
| 184 | DUX4L2   | 1 |
| 185 | DENND1A  | 1 |
| 186 | DCAF12L2 | 1 |
| 187 | ATP11B   | 1 |
| 188 | PDK3     | 1 |
| 189 | BCL2L14  | 1 |
| 190 | USP6NL   | 1 |
| 191 | ARID3A   | 1 |
| 192 | CLDN1    | 1 |

|     |         |   |
|-----|---------|---|
| 394 | RP9     | 1 |
| 395 | Dec-01  | 1 |
| 396 | RTKN2   | 1 |
| 397 | GCM2    | 1 |
| 398 | EIF3K   | 1 |
| 399 | Reep2   | 1 |
| 400 | BORA    | 1 |
| 401 | FBXO7   | 1 |
| 402 | SULT6B1 | 1 |
| 403 | SEMA3A  | 1 |
| 404 | N4BP2   | 1 |
| 405 | PLEKHF1 | 1 |
| 406 | COA1    | 1 |
| 407 | BFAR    | 1 |
| 408 | TCAP    | 1 |
| 409 | CDH9    | 1 |
| 410 | CCDC50  | 1 |
| 411 | FBXW7   | 1 |
| 412 | NKX6-3  | 1 |
| 413 | TSC2    | 1 |
| 414 | BCL3    | 1 |
| 415 | CHEK2   | 1 |
| 416 | RPS6KB1 | 1 |
| 417 | BCKDHB  | 1 |
| 418 | SCN2B   | 1 |
| 419 | KBTBD11 | 1 |
| 420 | ZBTB32  | 1 |
| 421 | CHST11  | 1 |
| 422 | GPR157  | 1 |
| 423 | ZACN    | 1 |
| 424 | PQLC3   | 1 |
| 425 | FUK     | 1 |
| 426 | MAF     | 1 |
| 427 | RNF32   | 1 |
| 428 | FKBP9   | 1 |
| 429 | TNFSF8  | 1 |
| 430 | SPOCK2  | 1 |
| 431 | ADO     | 1 |
| 432 | CAPN12  | 1 |

|     |         |   |
|-----|---------|---|
| 193 | CENPW   | 1 |
| 194 | LOXL4   | 1 |
| 195 | SLC29A1 | 1 |
| 196 | PARD3B  | 1 |
| 197 | HIF1A   | 1 |
| 198 | ULK2    | 1 |
| 199 | IFT74   | 1 |
| 200 | PYROXD2 | 1 |
| 201 | MRPL1   | 1 |
| 202 | CSMD3   | 1 |
| 203 | MBD5    | 1 |
| 204 | STS     | 1 |
| 205 | NHS     | 1 |
| 206 | CREB5   | 1 |
| 207 | FHOD3   | 1 |
| 208 | PID1    | 1 |
| 209 | RUNX2   | 1 |
| 210 | PTPRJ   | 1 |
| 211 | CBFA2T2 | 1 |
| 212 | MOB3A   | 1 |
| 213 | URI1    | 1 |
| 214 | MDGA2   | 1 |
| 215 | KHK     | 1 |
| 216 | STXBP6  | 1 |
| 217 | FAM3C   | 1 |
| 218 | EDEM1   | 1 |
| 219 | MYOC    | 1 |
| 220 | P2RY2   | 1 |
| 221 | KARS    | 1 |
| 222 | NPTXR   | 1 |
| 223 | HMGCR   | 1 |
| 224 | MUC4    | 1 |
| 225 | FIG4    | 1 |
| 226 | RGS10   | 1 |
| 227 | SRRM4   | 1 |
| 228 | PEBP4   | 1 |
| 229 | SCFD1   | 1 |
| 230 | ARHGEF4 | 1 |
| 231 | NOL10   | 1 |

|     |         |   |
|-----|---------|---|
| 433 | SPOCK3  | 1 |
| 434 | PCDHB1  | 1 |
| 435 | Gbx2    | 1 |
| 436 | HEATR5B | 1 |
| 437 | ZNF648  | 1 |
| 438 | ARF4    | 1 |
| 439 | PCLO    | 1 |
| 440 | CHRNA9  | 1 |
| 441 | MBD3L3  | 1 |
| 442 | PLA2G10 | 1 |
| 443 | PNMT    | 1 |
| 444 | ANK1    | 1 |
| 445 | CIITA   | 1 |
| 446 | ERCC2   | 1 |
| 447 | EWSR1   | 1 |
| 448 | PGAP3   | 1 |
| 449 | IKZF3   | 1 |
| 450 | AKT2    | 1 |
| 451 | TPRG1   | 1 |
| 452 | TYRP1   | 1 |
| 453 | NRXN1   | 1 |
| 454 | BZW1    | 1 |
| 455 | MDS1    | 1 |
| 456 | CLDN16  | 1 |
| 457 | NANOS3  | 1 |
| 458 | ARX     | 1 |
| 459 | BMP8    | 1 |
| 460 | MAP2    | 1 |
| 461 | DYSF    | 1 |
| 462 | RTN4IP1 | 1 |
| 463 | TCRA    | 1 |
| 464 | LEU2    | 1 |
| 465 | PCDH8   | 1 |
| 466 | ZNF174  | 1 |
| 467 | CKAP2   | 1 |
| 468 | PGF     | 1 |
| 469 | LTBP2   | 1 |
| 470 | NUMB    | 1 |
| 471 | RGNEF   | 1 |

|     |         |   |
|-----|---------|---|
| 232 | WHSC1   | 1 |
| 233 | DEK     | 1 |
| 234 | RFWD2   | 1 |
| 235 | SGIP1   | 1 |
| 236 | SLC24A4 | 1 |
| 237 | COL23A1 | 1 |
| 238 | HRH1    | 1 |
| 239 | KDM6B   | 1 |
| 240 | PDZD8   | 1 |

|     |        |   |
|-----|--------|---|
| 472 | UBN2   | 1 |
| 473 | FXR2   | 1 |
| 474 | TMEM49 | 1 |
| 475 | CNN2   | 1 |
| 476 | HOX11  | 1 |
| 477 | LYT10  | 1 |
| 478 | PAX2   | 1 |
| 479 | APM1   | 1 |
| 480 | DCC    | 1 |
| 481 | DPC4   | 1 |
